# Supplementary material for: PTPIP51 regulates mouse cardiac ischemia/reperfusion through mediating the mitochondria-SR junction
Source: PubMed Central journal article supplement (PMC5366942; doi:10.1038/srep45379), 2017-03-27

**PTPIP51 regulates mouse cardiac ischemia/reperfusion through mediating the mitochondria-SR junction**

Xue Qiao<sup>1</sup>, Shi Jia<sup>1</sup>, Jingjing Ye<sup>1</sup>, Xuan Fang<sup>1</sup>, Chenglin Zhang<sup>1</sup>, Yangpo Cao<sup>1</sup>, Chunling Xu<sup>1</sup>, Lifang Zhao<sup>1</sup>, Yi Zhu<sup>1</sup>, Lu Wang<sup>2</sup>, Ming Zheng<sup>1\*</sup>

- 1) Department of Physiology and Pathophysiology, and 2) Center for Human Disease Genomics, School of Basic Medical Sciences, Health Science Center, Peking University, Beijing 100191, China

**Running title:** PTPIP51 in Cardiac Ischemia/Reperfusion

***Address Correspondence to:***

Ming Zheng, M.D., Ph.D.  
Department of Physiology and Pathophysiology  
Health Science Center, Peking University  
Beijing 100191  
China  
Tel.: 86-10-8280-2403  
Fax: 86-10-8280-2403  
E-Mail: [zhengm@bjmu.edu.cn](mailto:zhengm@bjmu.edu.cn)

### Supplemental Figure Legends

**Figure S1. Echocardiography of mouse I/R model and knockdown of PTPIP51 protected cardiomyocytes from H<sub>2</sub>O<sub>2</sub> mediated apoptosis.** **A**, Representative of M-mode echocardiography of sham or I/R mouse. **B**, Mean data of ejection fraction (EF) and fractional shortening (FS). n=4 pairs of mice. \**P*<0.05 versus sham mouse. **C**, TUNEL staining and **D**, Annexin V-PI by flow cytometry in rat neonatal cardiomyocytes transfected with scramble or PTPIP51 shRNA in the presence of H<sub>2</sub>O<sub>2</sub> (200 μM, 12 h).

**Figure S2. Generation and characteristics of PTPIP51 knockdown mouse model and its cardiac protective effects after I/R.** **A**, Schematic view of constructing an AAV9-mediated PTPIP51 shRNA mice model. **B**, M-mode echocardiography of AAV9-sh-Scramble and AAV9-sh-PTPIP51 mice before and after I/R. **C**, TUNEL assay of hearts from indicated mice. n=7–14 frames from four pairs of mice. \**P*<0.05 versus sham scramble; #*P*<0.05 versus scramble with I/R injury.

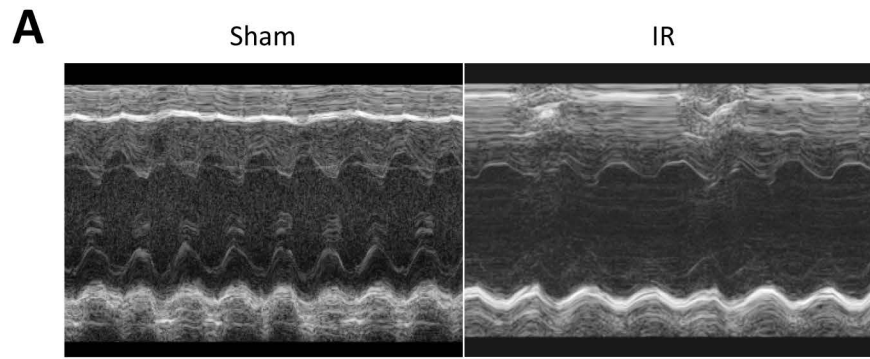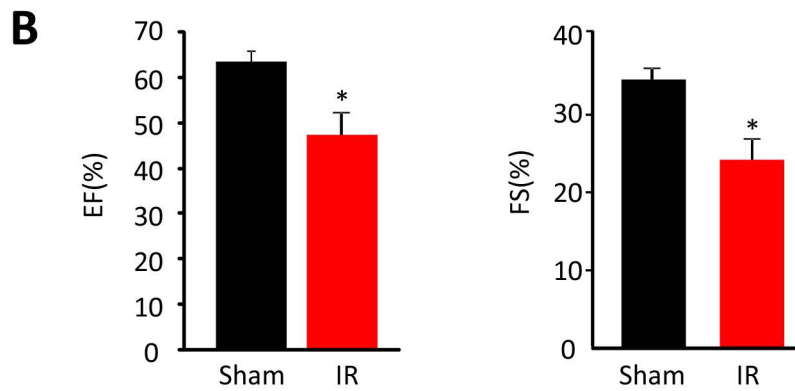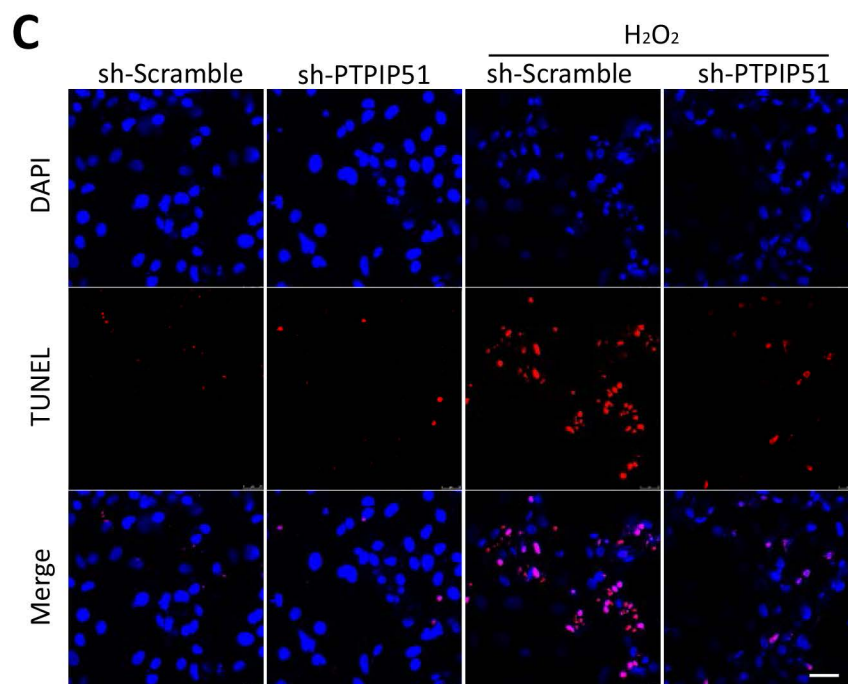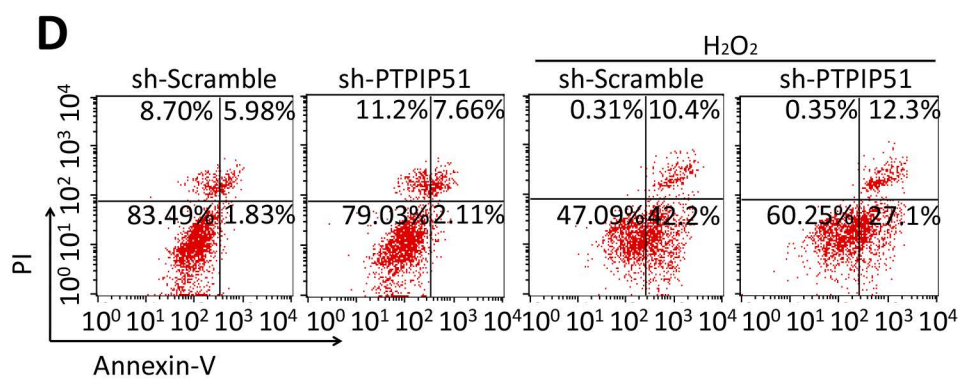

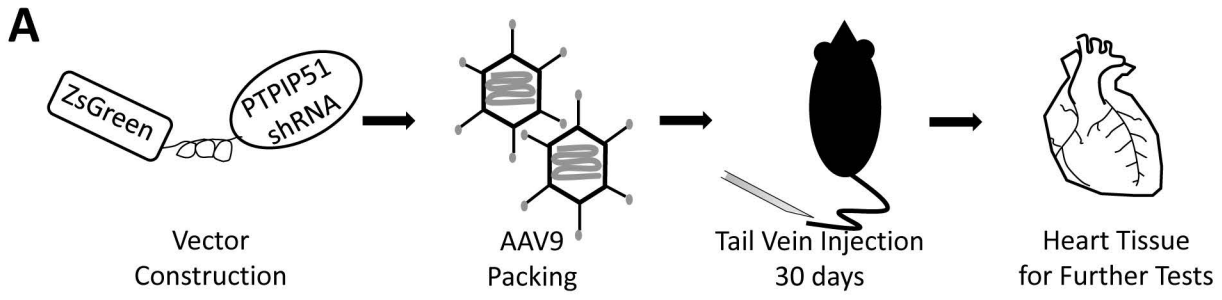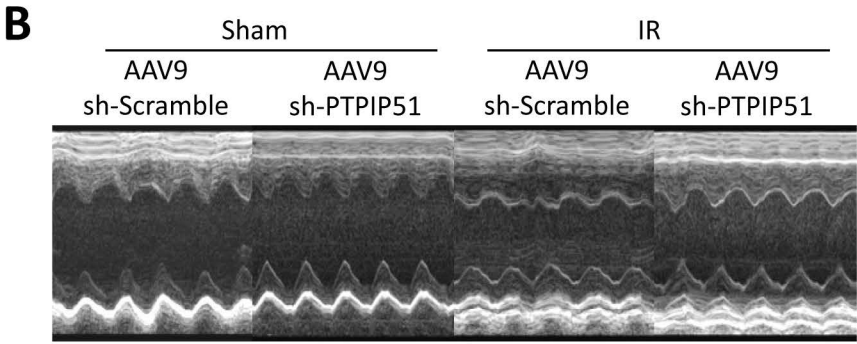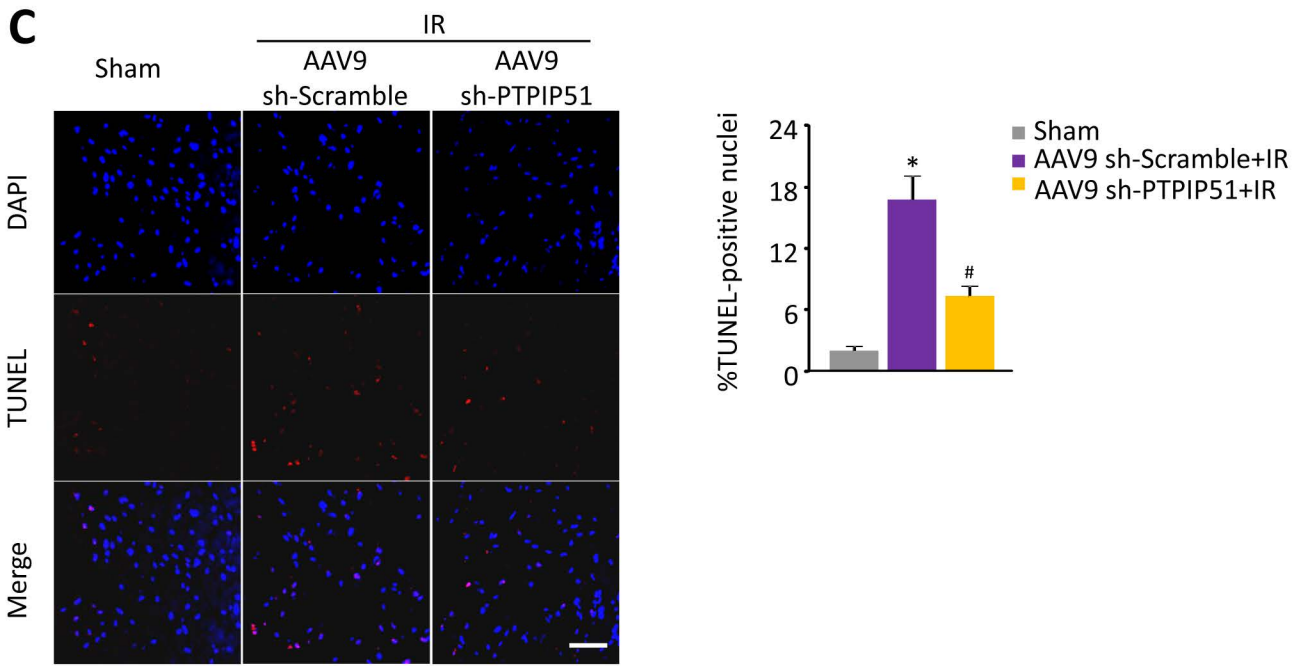

Supplement: srep45379-s1.pdf [file srep45379-s1.pdf]
